1  
2  
3  
4  
5  
6  
7  
8  
9  
10  
11  
12  
13  
14  
15  
16  
17  
18  
19  
20  
21

Whole-genome sequencing of multiple isolates of *Puccinia triticina* reveals asexual lineages evolving by recurrent mutations.

John P. Fellers<sup>1</sup>, Sharadha Sakthikumar<sup>2</sup>, Fei He<sup>3</sup>, Katie McRell<sup>3</sup>, Guus Bakkeren<sup>4</sup>, Christina A. Cuomo<sup>2</sup> and James A. Kolmer<sup>5</sup>

1. USDA-ARS, Hard Winter Wheat Genetics Research Unit, Manhattan, KS 66506.
2. Broad Institute and MIT, Cambridge, MA, 02142.
3. Department of Plant Pathology, Kansas State University, Manhattan, KS 66506.
4. Agriculture and Agri Food Canada, Summerland, BC V0H1Z0.
5. USDA-ARS, Cereal Disease Laboratory, St. Paul, MN 55108.

Corresponding Author: John P. Fellers

USDA-ARS  
4008 Throckmorton Hall  
Department of Plant Pathology  
Manhattan, KS 66506  
[john.fellers@usda.gov](mailto:john.fellers@usda.gov)

22 **ABSTRACT**

23 **Background:** The wheat leaf rust fungus, *Puccinia triticina* Erikss. is a worldwide pathogen of  
24 tetraploid durum and hexaploid wheat. Many races of *P. triticina* differ for virulence to specific  
25 leaf rust resistance genes and are found in most wheat-growing regions of the world. Wheat  
26 cultivars with effective leaf rust resistance exert selection pressure on *P. triticina* populations for  
27 virulent race types. The objectives of this study were to examine whole-genome sequence data  
28 of 121 *P. triticina* isolates and to gain insight into race evolution. The collection included isolates  
29 comprising many different race phenotypes collected worldwide from common wheat in the U.S.  
30 and the European Union together with isolates from durum wheat. One isolate from the wild  
31 wheat relative *Aegilops speltoides*, and two from *Ae. cylindrica* were also included for  
32 comparison.

33 **Results:** Based on 121,907 variants identified relative to the reference race 1-1 genome, the  
34 isolates were clustered into 11 major lineages with 100% bootstrap support. The isolates were  
35 also grouped based on variation in approximately 1400 secreted resistance interactor candidate  
36 proteins. In gene-coding regions, all groups had high ratios of non-synonymous to synonymous  
37 mutations and nonsense to readthrough mutations.

38 **Conclusions:** Based on total variation or variation in the secreted protein genes, isolates  
39 grouped the same indicating that variants were distributed across the entire genome. Our  
40 results suggest that recurrent mutation and selection play a major role in differentiation within  
41 the clonal lineages.

42

43 **Keywords:** wheat leaf rust, *Puccinia triticina*, genomic relationship, pathogen adaptation

44

45

## 46 **BACKGROUND**

47           Rust diseases of cereal crops are widespread throughout grain-growing regions  
48 of the world and are capable of causing severe yield loss (Saari and Prescott 1985). Of  
49 the three rust diseases on wheat (Kolmer et al 2019), leaf rust caused by *Puccinia*  
50 *tritricina* Erikss., is the most widespread and is the leading cause of yield loss on a  
51 worldwide basis (Savary et al 2019). In the United States, leaf rust is found in the soft  
52 red winter wheat region of the eastern and southern states, the hard red winter wheat  
53 region of the southern Great Plains and in the hard red spring wheat region of the  
54 northern Great Plains (Kolmer 2019). In 2007, a severe leaf rust epidemic occurred in  
55 the Great Plains region and losses in Kansas and Minnesota were estimated at 14%  
56 and 7%, respectively (Kolmer et al 2009).

57           Like the other cereal rusts, *P. tritricina* is a heteroecious rust that requires two  
58 taxonomically unrelated hosts to complete the sexual cycle, and is macrocyclic with five  
59 distinct spore stages (Kolmer et al. 2019). The principle hosts of *P. tritricina* are  
60 common hexaploid wheat *Triticum aestivum* L.; tetraploid durum wheat *T. turgidum* L.  
61 ssp. *durum*; and wild emmer wheat *T. turgidum* ssp. *dicoccoides* (Bolton et al. 2008).  
62 Infections of *P. tritricina* are also found on *Aegilops cylindrica* L. (goatgrass) in the  
63 southern Great Plains region. Dikaryotic urediniospores are produced asexually on  
64 susceptible host plants and can cycle indefinitely. Dissemination of the disease occurs  
65 by wind-blown urediniospores that are deposited in wheat fields by precipitation events.  
66 The urediniospores germinate and penetrate the host plants through the stomata and  
67 form haustoria in the mesophyll cells below the epidermal and palisade layers of cells.  
68 New uredinia erupt on the upper leaf surface within 7-10 days after the initial infection.

69 Two-celled, dikaryotic teliospores are formed in the old uredinia (subsequently called  
70 telia), which are the overwintering stage. In the spring, teliospores undergo a brief  
71 diploid phase, and then each cell germinates to produce four haploid basidiospores that  
72 infect alternate hosts. The sexual cycle is completed by the production of haploid  
73 spermatogonia and spermatia on the upper leaf surface. Fertilization results in dikaryotic  
74 aeciospores in aecial cups on the lower leaf surface. The aeciospores are wind-  
75 dispersed and infect the uredinial-telial hosts. The most compatible alternate host of *P.*  
76 *tritricina* is *Thalictrum speciosissimum* L, common meadow rue. Susceptible alternate  
77 hosts in *Thalictrum* spp. are found in southern Europe and West Asia (Jackson and  
78 Mains, 1921; Saari et al. 1968), however in North America, native *Thalictrum* species  
79 have limited susceptibility to basidiospore infection. Populations of *P. tritricina* in North  
80 America (Ordonez and Kolmer 2009) and worldwide (Kolmer et al 2019) have high  
81 levels of linkage disequilibrium and higher than expected heterozygosity for  
82 microsatellite or simple sequence repeat (SSR) loci, which strongly indicated clonal  
83 reproduction.

84 *Puccinia tritricina* interacts with wheat in a gene-for-gene manner (Samborski and  
85 Dyck 1968: 1976) as described by Flor (1942, 1971). Specific leaf rust resistance  
86 genes in wheat interact with specific effector gene products in avirulent isolates to  
87 produce incompatible infection types, which range from minute hypersensitive necrotic  
88 flecks to small uredinia that are surrounded by necrosis or chlorosis (Bolton et al. 2008).  
89 Isolates that lack corresponding effectors and are virulent to the specific leaf rust  
90 resistance gene, produce large uredinia without chlorosis or necrosis and can produce  
91 hundreds of urediniospores daily. Since the mid-1940s (Kolmer 2019) wheat breeding

92 programs in the Great Plains region have released wheat cultivars with leaf rust  
93 resistance genes that provide resistance to most of the *P. triticina* population. However,  
94 within a few years after release, virulent genotypes of *P. triticina* arise and increase,  
95 rendering the cultivars susceptible. As a result of the constant selection for virulent  
96 genotypes, many different races of *P. triticina* are found in the U.S. (Kolmer 2019) and  
97 worldwide (Kolmer et al. 2019). Races of *P. triticina* are determined by the avirulent or  
98 virulent classification of infection types produced by single-uredinial isolates on wheat  
99 genotypes that differ by single leaf rust resistance genes (Bolton et al 2008).

100 In the absence of the sexual cycle, the source of new races in *P. triticina* in North  
101 America has been assumed to be somatic mutation of urediniospores. Some isolates of  
102 *P. triticina* have been shown to be heterozygous for avirulence/virulence alleles to  
103 specific leaf rust resistance genes (Samborski and Dyck, 1968, 1976; Statler 1977;  
104 1979; 1982; 2000). Mutations at heterozygous loci can lead to loss of recognition by  
105 the host resistance protein and result in a compatible infection type (Kolmer and Dyck  
106 1994). Infections of *P. triticina* can survive the winter in a large area of the winter wheat  
107 region of the southern U.S., resulting in a large population in which mutation and  
108 selection of virulent genotypes due to host resistance genes can occur.

109 A reference genome sequence of *P. triticina* was recently produced (Coumo et  
110 al. 2017). The genome was of race 1-1, designated as BBBDB in the *P. triticina*  
111 nomenclature system (Long and Kolmer, 1989). This isolate is avirulent to most leaf  
112 rust resistance genes and is heterozygous for avirulence/virulence at a number of  
113 effector loci (Samborski and Dyck, 1968). The genome contains 135 Mb of DNA, 51%  
114 mobile and repetitive elements, with an estimated 14,800 genes. The reference genome

115 is very useful for alignment of sequence reads for identifying and assessing genetic  
116 polymorphisms in populations of *P. triticina* using whole-genome sequencing of sample  
117 isolates.

118 In this study, a large number of *P. triticina* isolates collected from common wheat  
119 in North America and Europe, with many different race phenotypes, were sequenced  
120 and compared with the race 1-1 BBBDB reference genome. In addition, isolates  
121 collected from durum wheat worldwide, and the wheat relatives *Ae. cylindrica* and *Ae.*  
122 *speltoides* were also sequenced and compared with the reference genome. The  
123 objectives of the research were: 1) to determine the phylogenetic lineage relationships  
124 in a diverse collection of *P. triticina* , 2) to characterize the genetic variation within  
125 lineages, and 3) to examine the relationship between molecular phylogeny and race  
126 phenotype.

127

128

## 129 **RESULTS**

130 The genomes of 121 isolates of *P. triticina* were included in this study  
131 (Supplemental Table 1). Eighty-five isolates were from North America, with 65 different  
132 virulence phenotypes; 21 isolates were collected from durum wheat from various  
133 countries world-wide with three different virulence phenotypes; and 12 isolates were  
134 collected from common wheat in Europe with 11 different virulence phenotypes. A  
135 single isolate from *Ae. speltoides* was collected in Israel, and two isolates from North  
136 America were collected from *Ae. cylindrica* (common goatgrass). The virulence  
137 phenotype, country of origin, sequence statistics, avirulence/virulence formula, and  
138 references to previous characterization by earlier marker systems for each isolate is

139 listed in Supplemental Table 1. The isolate from *Ae. speltoides* (Pt\_ISR\_850) had the  
140 lowest alignment to the reference genome at 78%, all other isolates had > 90%  
141 alignment. Average depth of coverage across the reference genome ranged from 9X  
142 (isolate 11US045\_2 TNBGJ) to 95X (isolate 11US220\_3 MFNSB).

143 Maximum parsimony analysis was used to determine relationships between  
144 isolates based on SNP genotypes. Using 121,907 informative SNPs from sites with <=  
145 5% missing calls, the isolates could be clustered into eleven major groups with 100%  
146 support. The isolates from North America (NA) clustered into six discrete groups (Fig  
147 1). The genome reference BBDB race 1-1, collected in 1954 (Ordonez and Kolmer,  
148 2009), was in the NA1 group with three other isolates. Isolate 04NE356, with the similar  
149 virulence phenotype BBBDJ, was collected 50 years later and differed by only 4,447  
150 SNPs when compared to the reference genome. The NA2 group consisted of eleven  
151 isolates with ten different virulence phenotypes that were all avirulent to the isogenic  
152 *Lr2a* line, and virulent to lines with genes *Lr2c* and *Lr28* (Supplemental Table 2). The  
153 35 NA3 group isolates consisted of 25 phenotypes that were all virulent to genes *LrB*,  
154 *Lr3bg*, *Lr17*, and avirulent to *Lr28*. These virulence phenotypes were first found in large  
155 numbers in the mid 1990's after the release of *Lr37* in hard red winter cultivars in the  
156 southern Great Plains (Ordonez and Kolmer, 2009; Kolmer 2019). The two isolates in  
157 the NA4 group were both virulent to wheat lines with *Lr1*, *Lr2a*, *Lr2c*, *Lr17*, *Lr28*, and  
158 avirulent to *Lr3*. These isolates were originally collected from *Ae. cylindrica* in the  
159 southern Great Plains and were widely separated from the other NA groups. The NA5  
160 group consisted of 32 isolates with 23 different virulence phenotypes that were avirulent  
161 to lines with genes *LrB*, *Lr17*, and virulent *Lr28*. Two isolates PBJL\_PRTUS6 and

162 PBJSF\_84VAPA, that are both avirulent to wheat lines with *Lr2a*, and virulent to *Lr2c*,  
163 *Lr11* and *Lr17*, were highly related and were placed in the NA6 group. A single isolate,  
164 TCTDL\_03VA190, did not cluster with isolates in any other group.

165 Thirteen isolates from Europe (EU) with 12 different virulence phenotypes were  
166 all virulent to *LrB*, avirulent to *Lr28*, and varied for virulence to the other *Lr* genes  
167 (Supplemental Table 2, Fig. 1). The European isolates were also more diverse for SNP  
168 genotypes, but were grouped discretely from all isolates in the NA groups. One isolate,  
169 DBBQJ\_09AZ, was collected from durum wheat in Arizona, but was grouped with the  
170 European isolates since it was highly related to those isolates for virulence and SNP  
171 genotype. All other isolates collected from durum wheat had distinct SNP genotypes  
172 compared to the isolates from hexaploid wheat. The seven Ethiopian durum  
173 (ETH\_DURUM) isolates were distinct for SNP genotype compared to the other isolates  
174 from durum. These isolates are all avirulent to cultivar Thatcher, the recurrent parent of  
175 the differential lines, and thus were not phenotyped. Isolates collected from durum  
176 wheat in California, Mexico, Argentina, Spain, Ethiopia, France, and Israel (DURUM)  
177 were closely related for SNP genotype, and were distinct from all other isolates. These  
178 isolates were all virulent to *Lr14b* and *Lr20* (Supplemental Table 2), and avirulent to  
179 most of the other *Lr* genes in the differential set. A single isolate collected in Israel from  
180 diploid wheat progenitor *Ae. speltoides*, had a distinct SNP genotype and did not cluster  
181 with isolates from any other group. The isolate SCPBJ\_ISR173, collected in Israel from  
182 common wheat, also did not group with any other isolates in any of the genotype groups  
183 but was closest for genotype to the two isolates in NA4 that had similar virulence  
184 phenotypes.



185 Excluding the isolate from *Ae. speltoides*, isolates in NA4 had the lowest average  
186 number of SNPs relative to the race 1-1 reference genome at 310,033 and the durum  
187 isolates in the ETH-Durum group had the highest average number of SNPs at 450,544  
188 (Table 1). Isolates in NA4 also had the lowest  $\pi$  value of  $2.29 \times 10^{-3}$  and isolates in the  
189 ETH-durum group had the highest  $\pi$  value of  $3.33 \times 10^{-3}$ . The isolates from the groups  
190 collected from common wheat had higher levels of SNP heterozygosity ranging from  
191 76% for NA3 to 97% for NA1. The International durum and Ethiopian durum groups had  
192 lower levels of SNP heterozygosity at 56% (Table 1). Even though the isolate from *Ae.*  
193 *speltoides* had the highest number of SNPs relative to the Race 1-1 reference genome  
194 at 996,187 only 35% were heterozygous. The large majority of the SNPs in all isolates  
195 occurred in the non-expressing intergenic regions, between 78.5% for the isolate from  
196 *Ae. speltoides* to 84.6% for isolates in NA4. The ratios of nonsynonymous to  
197 synonymous SNPs within the expressed regions were greater than 1.0 for all groups,  
198 and ratios for nonsense to read through SNPs were greater than 4.0 for all groups.

199 The isolates were also grouped in a two-dimensional PCA plot simply based on  
200 virulence to the 22 Thatcher *Lr* isolines (Figure 2). The isolates did not fall into discrete  
201 nonoverlapping clusters. However, there were regions of the PCA plot where most of  
202 the isolates were from one group. Of the NA groups, isolates in NA1, NA2, NA4, and  
203 NA5 were grouped more closely in the right side of the plot with positive first axis  
204 values, while isolates in NA3 and NA6 all had negative first axis values. Isolates in the  
205 EU group were diverse for virulence and were found in both sides of the plot. Of the NA  
206 groups with more than 10 isolates, isolates in NA3 had the smallest average virulence  
207 difference at 3.50, and isolates in NA5 had the largest at 4.85 (Table 2). Isolates in the

208 International Durum group were very closely related for virulence, differing on average  
209 by only 1.03. The average virulence difference overall the 121 isolates was 7.90.

210 The total SNP variation (intronic and intergenic) was then compared to SNPs that  
211 occurred only in predicted secreted proteins to determine if there were differences in the  
212 genetic relationship between isolates based on total genomic variation and variation that  
213 occurred in genes involved with pathogenicity and virulence specificity. Isolates in ETH-  
214 Durum and the *Ae. speltoides* isolate were not included due to their high divergence  
215 from the other isolate groups. The two-dimensional principal coordinate plot of the total  
216 343,000 SNPs across the genome (Figure 3A) grouped the isolates in the same manner  
217 as in the neighbor joining plot. Analysis of variation in predicted secreted peptides was  
218 based on 16,000 SNPs within 2,000 bp 5' of the start codon open reading frame, and  
219 2,000 bp 3' of the stop codon of ca. 1,400 genes. Isolates were clustered the same as  
220 for the total genomic data (Figure 3B). Median diversity ( $\pi$ ) for all SNP's and SNPs  
221 within secreted peptides averaged >40% (Figure 4a) indicating very large genetic  
222 variation across each contig or gene, with the total genomic SNPs being slightly more  
223 diverse, although within the standard deviation of the average diversity of the secreted  
224 peptides. The median *Fst* measures population differentiation and divergence for each  
225 contig or gene. A generally higher median (Figure 4b) and 2X higher median density  
226 (Figure 4c) was seen for secreted peptides, though within standard deviation of the total  
227 genomic mean.

228 The relationship between virulence phenotype and SNP genotype was further  
229 examined. In clonal populations such as *P. triticina*, it would be expected to find at least  
230 a general correlation between phenotype and genotype. As genetic similarity between

231 isolates increased to over 90%, the similarity of isolates for virulence phenotype  
232 increased to over 60% (Fig. 5). At this high level of genetic similarity there was no  
233 difference in phenotypic similarity between total genomic SNPs and SNPs in predicted  
234 secreted proteins.

235 A genome-wide association study (GWAS) was conducted based on avirulence  
236 and virulence to the near isogenic Thatcher lines that differ for single resistance genes.  
237 The association analysis was conducted for total genomic SNPs and also for SNPs  
238 within secreted peptides. More than 400 contigs in the total genomic data (Figure 6a)  
239 and SNPs in 50 contigs predicted secreted peptides (Figure 6b) were associated with  
240 virulence/avirulence to Thatcher lines with *Lr17* and *Lr28*. Relatively few contigs were  
241 associated with virulence/avirulence to lines with *LrB*, *Lr10*, *Lr16*, and *Lr21*.  
242 Virulence/avirulence to nine of the Thatcher lines was associated with less than 15  
243 SNPs in predicted secreted proteins.

## 244 **DISCUSSION**

245  
246 The lineage groups in North America are highly associated with  
247 avirulence/virulence to specific leaf rust resistance genes. In the absence of sexual  
248 recombination, clonal reproduction of urediniospores has maintained the association  
249 between molecular genotype and virulence. In a previous study based on allelic  
250 variation at 23 SSR loci (Ordonez and Kolmer, 2009), isolates with the characteristic  
251 avirulence/virulence as the isolates in this study were placed in the NA1, NA2, NA3,  
252 NA4, NA5 groups, and in a separate group of isolates that had high virulence to durum  
253 wheat. The NA1, NA2, NA4, and NA5 groups are long-standing in North America, as  
254 isolates with the characteristic virulence (Johnston et al 1968 ) can be found dating to

255 the 1950s. Isolates in NA3 first become common in the mid 1990s after hard red winter  
256 wheat cultivars with *Lr37* were widely grown in the southern Great Plains (Ordonez and  
257 Kolmer, 2009). In the current *P. triticina* population in the U.S., isolates with the  
258 characteristic virulence of NA3 account for the large majority of all isolates (Kolmer,  
259 2019). Two isolates were assigned to different NA groups based on SNP genotype  
260 compared to SSR genotypes. Isolate PBJSF\_84VA was previously placed in the NA2  
261 group based on SSR genotype, however the complete genome sequence data placed  
262 this isolate with isolate PBJL\_PRTUS6 in the NA6 group. Similarly, isolate  
263 TCTDL\_03VA was placed in NA1 based on SSR genotype, however based on complete  
264 genome sequence this isolate was not closely related to any other isolates that were  
265 sequenced in this study. Isolate Durum\_09AZ103A was collected from durum wheat in  
266 Arizona in 2009. Surprisingly this isolate had an SNP genotype that placed it with  
267 isolates from Europe, indicating the high probability of this isolate being a recent  
268 introduction. The isolates from Europe that were sequenced in this study were distinct  
269 for SNP genotype from all of the other North American isolates. In a previous study,  
270 these same European isolates were also very distinct for SSR genotype compared to  
271 the North American isolates (Kolmer et al 2019).

272 In this study, all of the isolates were sequenced using short read technology.  
273 When BBBDB race 1-1 was re-sequenced and aligned back to the genome reference  
274 sequence, 273,385 SNPs were identified. The reference genome (Cuomo et al. 2017)  
275 was assembled using the Arachne (HybridAssemble; Jaffe et al., 2003) program, and it  
276 is likely that since the genome is dikaryotic significant regions sequenced from each  
277 nucleus were collapsed into one contig. The high number of SNPs from the alignment

278 of BBBDB race 1-1 back to the reference genome is likely due to sequence from each  
279 genome being aligned to a contig region and the GATK program identifying differences  
280 caused by the two genomes. The high number of SNPs of the re-sequenced  
281 BBBDB\_race 1-1 and the other isolates in the NA1 group relative to the reference  
282 genome is most probably caused by the assembly of the two genomes into a single  
283 genome. The high SNP heterozygosity of the groups from common wheat may also be  
284 a result of the genomes being collapsed into a single genome. Wu et al. (2017) re-  
285 sequenced 20 isolates of *P. triticina* from Australia that were aligned with the reference  
286 genome. The 20 isolates averaged 404,690 SNPs with 87% heterozygosity relative to  
287 the reference genome. Recently, the genome assembly of *P. graminis* f.sp. *tritici* was  
288 sorted into two groups representing the two nuclei. Using long reads, chromosome  
289 association, and specific algorithms, Feng et al. (2019) was able to sort contigs into  
290 their respective genomes. Kolmer et al., (2020) noted much lower heterozygosity on the  
291 order to 8-12% of SNPs in a large collection of *P. triticina* isolates that were  
292 characterized with the genotype-by-sequence (GBS) approach. The reads (100 bp,  
293 single end) of isolates in the GBS study were also aligned with the BBBDB race 1-1  
294 reference genome, however the alignment, genotype data, VCF file, and haplotypes  
295 were extracted using different software programs. Differences in the mapping, SNP  
296 calling, threshold levels for heterozygotes, genome coverage, regions of the genome  
297 sequenced, depth of coverage, and assembly programs may also contribute the  
298 discrepancies in results between studies. Interestingly, both groups of isolates from  
299 durum wheat and the single isolate from *A. speltoides* had much lower levels of SNP  
300 heterozygosity compared to the isolates from common wheat.

301 Results of the whole genome sequence confirmed the genetic relationships  
302 between the isolate virulent to the diploid wheat progenitor *A. speltoides*, and forms of  
303 *P. triticina* specialized for virulence to tetraploid durum wheat and hexaploid common  
304 wheat. The maximum parsimony neighbor joining tree indicated that the *A. speltoides*  
305 isolate was most closely related to the ETH-Durum isolates, followed by the worldwide  
306 isolates virulent to durum wheat, and then isolates virulent to common wheat. In a  
307 coalescence analysis based on sequence at 15 loci, Liu et al 2014 determined that the  
308 form found on *A. speltoides* was the ancestral form of *P. triticina*, followed by the ETH-  
309 Durum isolates, and then by the isolates virulent to common wheat and durum wheat.  
310 Kolmer et al., (2020) using a molecular clock approach in the GBS study also found the  
311 same phylogenetic relationships between the different forms of *P. triticina*. The ETH-  
312 Durum isolates are highly virulent to durum wheat, but are avirulent to almost all  
313 common wheat cultivars, and have been found only in Ethiopia (Kolmer and Acevedo  
314 2016). Ethiopia is a secondary center of origin of tetraploid wheat, where landrace  
315 cultivars of emmer and durum wheat are still grown (Eticha et al. 2006). The ETH-  
316 Durum isolates may be a remnant of the *P. triticina* population that existed before the  
317 widespread cultivation of hexaploid common wheat cultivars. The unique host  
318 environment of the landrace tetraploid wheats may allow the ETH-Durum isolates to  
319 survive in Ethiopia. The two isolates in NA-4 have virulence phenotypes that are found  
320 on the diploid wheat relative, *A. cylindrica* in the southern Great Plains of the U.S. The  
321 *P. triticina* population in Europe were previously determined to be highly diverse for  
322 SSR genotype groups (Kolmer et al 2012). Somatic recombination has been

323 hypothesized as a source of variation in cereal rust fungi that reproduce clonally (Park  
324 et al 1999; Park and Wellings, 2012).

325 Host populations are important drivers of differentiation of plant pathogens at a  
326 species level and also for forms and genotypes within a species (Gladieux et al., 2017).  
327 The evolution of wheat from diploid progenitors to tetraploid and hexaploid cultivars was  
328 tracked by *P. triticina* (Liu et al 2014). Isolates of *P. triticina* that are virulent to  
329 hexaploid common wheat have many different virulence phenotypes that have been  
330 selected by leaf rust resistance genes (Kolmer 2019). Sequence variation in genes  
331 associated with pathogenicity and gene-for-gene interactions could possibly be used to  
332 differentiate pathogen genotypes for virulence to host resistance genes. However, even  
333 though isolates in the different NA groups differ for characteristic virulence to *Lr2a*, *Lr3*,  
334 *Lr3bg*, *Lr17*, *Lr28*, and *LrB*, there was no difference in the overall genetic relationship  
335 between isolates with groupings based on total genomic SNPs compared to groupings  
336 based on SNPs located in predicted secreted proteins associated with effector  
337 avirulence genes. Likewise, there was little difference in the nucleotide diversity,  
338 differentiation across contigs, and genetic similarity in relation to phenotypic similarity of  
339 total genomic SNPs and SNPs in secreted peptides. Contigs that had SNPs associated  
340 with virulence to *Lr17* and *Lr28* were the most numerous in both the total genomic SNPs  
341 and also the SNPs in the predicted secreted peptides. Since the current *P. triticina*  
342 population reproduces clonally, genomic SNPs associated with an NA group may not  
343 necessarily be linked with an effector gene, because mutations that occur throughout  
344 the genome are essentially linked, such as those found associated with *Lr17* virulence.

345 Similarly, the SNPs in predicted secreted proteins may be widely distributed in the  
346 genome and not specific to effectors that interact with isolate specific *Lr* genes.

## 347 **CONCLUSIONS**

348 In the absence of sexual recombination, mutations in noncoding and coding  
349 regions in *P. triticina* have accumulated, resulting in high levels of SNP and SSR  
350 (Kolmer et al 2019) heterozygosity, genetically differentiated groups, and a consistent  
351 association between virulence/avirulence and molecular genotypes. Despite the lack of  
352 sexual recombination with the resultant accumulation of mutations in coding regions  
353 different virulent phenotypes of *P. triticina* have continued to adapt to host resistance  
354 genes in both durum and common wheat cultivars and spread throughout the world.  
355 The forces of recurrent mutation, genetic drift, and selection by host resistance genes  
356 have together differentiated and diversified populations of *P. triticina* worldwide.

357

## 358 **METHODS**

359 **Isolate phenotyping.** Single uredinial isolates of *P. triticina* were increased on  
360 susceptible seedlings of *T. aestivum* variety 'Little Club' wheat (CI 4066; Clark et al,  
361 1926), and then inoculated onto 7-day old seedlings of Thatcher near-isogenic  
362 differential lines that differ for single leaf rust resistance genes. Thatcher lines with  
363 genes *Lr1*, *Lr2a*, *Lr2c*, *Lr3*, *Lr9*, *Lr16*, *Lr24*, *Lr26*, *Lr3ka*, *Lr11*, *Lr17*, *Lr30*, *LrB*, *Lr10*,  
364 *Lr14a*, *Lr18*, *Lr3bg*, *Lr14b*, *Lr20*, *Lr21*, *Lr28* and *Lr39* were used to characterize the  
365 isolates for virulence. Protocols for rust inoculation, incubation, and collection of  
366 urediniospores, and greenhouse conditions were as previously described (Kolmer and  
367 Hughes 2018). The isolates were rated for virulence to the individual Thatcher  
368 differential lines 10-12 days after inoculation. Isolates with infection types 3-4



369 (moderate to large uredinia lacking necrosis or chlorosis) were considered virulent, and  
370 infection types 0-2<sup>+</sup> (immune response with no sign of infection to moderate size  
371 uredinia with prominent chlorosis) were considered avirulent to the particular Thatcher  
372 line. Each isolate was given a 20-digit binary number based on the avirulent/virulent  
373 response to the 20 Thatcher differential lines.

374  
375 **DNA Extraction.** Seed of *Triticum aestivum* L. variety "Little Club" was planted in six  
376 10" x 10" x 2" aluminum cake pans containing Metro Mix 360 soil media (SunGro). At  
377 the two-leaf stage, seedlings were inoculated with 25 mg of urediniospores from each  
378 isolate by suspending the spores in 3 ml of Soltrol 170 paraffin oil (Phillips Petroleum,  
379 Bartlesville, OK). Seedlings were fogged with an atomizer using 40 psi of compressed  
380 air and placed in a dew chamber (I-36DL, Percival Scientific, Perry, IA) overnight at  
381 100% humidity and 20-22°C with lights off. Plants were placed back into a controlled  
382 environment chamber for 16 h/8 h day/night light cycle and 20 °C. After 11-14 d, spores  
383 were collected using a cyclonic Kramer-Collins spore collector (Tallgrass Solutions, Inc.  
384 Manhattan, KS). Urediniospores were germinated overnight by evenly scattering 0.5 g  
385 of spores over 300 ml of 1X germination solution contained in 20 x 30 cm Pyrex<sup>®</sup> baking  
386 pan (Webb et al. 2006). DNA was isolated as described in Cuomo et al., (2017). Spore  
387 mats were skimmed off the surface of the germination solution, washed 3X with ddH<sub>2</sub>O,  
388 dried in a Buchner funnel, and stored at -80 °C. From each mat, 350 mg of tissue was  
389 ground using liquid N<sub>2</sub>. DNA was isolated using the OmniPrep<sup>™</sup> DNA isolation Kit  
390 according to the recommended protocol for large tissue samples (Q-Biosciences, St.  
391 Louis MO, Cuomo et al., 2017).

392

393 ***Isolate sequencing and variance analysis.*** DNA samples were sent to the Broad  
394 Institute (Cambridge, MA) for sequencing and analysis. From each sample, 200 bp  
395 insert Illumina (Illumina, San Diego, CA) libraries were constructed and ligated with a  
396 unique index barcode. All libraries were pooled and sequenced with eight lanes of  
397 HiSeq 2000, 101 base-pairedend reads. Illumina reads were aligned against version 2  
398 of the *P. triticina* race 1-1 assembly (BBBDB; NCBI accession PRJNA36323) using  
399 BWA (Version: 0.5.9). Alignments were filtered requiring a mapping quality of 30 using  
400 SAMtools view (Li et al., 2009; Li and Durbin, 2010). Regions with high  
401 insertion/deletion counts, which could be misaligned, were identified using GATK  
402 (version v2.1.9; Makenna et al., 2010) RealignerTargetCreator and realigned using the  
403 GATK IndelRealigner. Single-nucleotide polymorphisms (SNPs) were identified using  
404 the GATK UnifiedGenotyper and filtered using GATK VariantFiltration (version 3) best  
405 practices for hard filters (QD < 2.0, MQ < 30.0, FS > 60.0, HS > [ $\mu+2\sigma$ ] MQRankSum < -  
406 12.5, ReadPosRankSum < -8.0), except that Haplotype Score (HS) was filtered above  
407 the mean HS plus two standard deviations. A single table of SNP calls in all strains was  
408 constructed, and at positions where no call was present in a strain the sequence data  
409 was re-evaluated to predict homozygous reference genotype calls. Using the pileup  
410 output from SAMtools, homozygous reference positions were called requiring a depth of  
411 at least eight and reference allele frequency >80%. Phylogenetic relationship based on  
412 heterozygous and homozygous SNP differences were inferred using PAUP Maximum  
413 Parsimony and 'hetequal' substitution model (Swafford 1998; 2002). DNA sequence

414 data were deposited at NCBI BioSample PRJNA77809, and individual race SRA run  
415 numbers are listed in Supplemental Table 1. PLINK1.9 was used for the calculation  
416 of principal components, and identity-by-descent and identity-by-state (IBD/IBS).  
417 VCFtools (<https://vcftools.github.io/>) was used to calculate  $F_{ST}$  and diversity nucleotide  
418  $\pi$ . Genome-wide association (GWAS) was performed through compressed mixed linear  
419 model (MLM) in GAPIT with the first 3 principal components as population structure  
420 (Zhang et al., 2010). SNPs were considered a significant GWAS association at a false  
421 data rate of adjusted P-value < 0.05.

422

423 **Declarations:**

424 **Ethics Approval:** NA

425 **Consent for publication:** All authors have consented for submission for publication.

426 **Data Availability:** All data has been deposited at NCBI under Bioproject PRJNA77809.

427 Individual isolates SRA sequence deposits are listed in Supplementary Table 1.

428 **Competing interests:** Authors declare no competing interests.

429 **Funding:** This work was funded through USDA CSREE awards 2008-35600-04693  
430 and 2009-65109-05916 and USDA-CRIS project 3020-21000-10-00D

431 **Authors' Contributions:** JPF, KM, and JAK Planned and developed experiments,  
432 isolated DNA, analyzed results and co-wrote the manuscript. SS and CAC planned and  
433 developed experiments, sequenced the samples, analyzed results and co-wrote the  
434 manuscript. GB provided data and co-wrote the manuscript.

435 **Acknowledgements:** We thank the Broad Institute Genomics Platform for generating  
436 all sequence data for this study. The authors would like to thank Robert Bowden and

437 Myron Bruce for their assistance in preparation of the manuscript and technical  
438 guidance.  
439 *Mention of trade names or commercial products in this publication is solely for the*  
440 *purpose of providing specific information and does not imply recommendation or*  
441 *endorsement by the U.S. Department of Agriculture. USDA is an equal opportunity*  
442 *provider and employer.*

443  
444 **REFERENCES**

- 445  
446 Bolton MD, Kolmer JA, Garvin DF: Wheat leaf rust caused by *Puccinia triticina*. Mol  
447 Plant Pathol. 2008; 9(5):563-575.  
448  
449 Clark JA, Love HH, Gains EF. Registration of standard wheat varieties. J Amer Soc  
450 Agron. 1926;18:920-922.  
451  
452 Cuomo CA, Bakkeren G, Khalil HB, Panwar V, Joly D, Linning R, Sakthikumar S, Song  
453 X, Adiconis X, Fan L, Goldberg JM, Levin JZ, Young S, Zeng Q, Anikster Y, Bruce M,  
454 Wang M, Yin C, McCallum B, Szabo LJ, Hulbert S, Chen X, Fellers JP.. Comparative  
455 analysis highlights variable genome content of wheat rusts and divergence of the  
456 mating loci. Genes Genomes Genetics. 2017;7:361-376.  
457  
458 Eticha F, Belay G, Bekele E Species diversity in wheat landrace populations from two  
459 regions of Ethiopia. Gen Res Crop Evol. 2006;53:387–393.  
460  
461 Feng L, Upadhyaya NM, Sperschneider J, Matny O, Nguyen-Phuc H, Mago R, Raley C,  
462 Miller ME, Silverstein KAT, Henningsen E, Hirsch CD, Visser B, Pretorius ZA,  
463 Steffenson BJ, Schwessinger B, Dodds PN, Figueroa M. . Emergence of the Ug99  
464 lineage of the wheat stem rust pathogen through somatic hybridisation. Nature Com.  
465 2019;10:5068.  
466  
467 Flor HH. Current Status of Gene-for-Gene Concept. Ann Rev of Phytopathology  
468 1971;9:27.  
469  
470 Flor HH. Inheritance of pathogenicity in *Melampsora lini*. Phytopathology 1942;32: 653–  
471 669.  
472  
473 Gladieux P, Ravel S, Rieux A, Cros-Arteil S, Adreit H, Milazzo J, Thierry M, Fournier E,  
474 Terauchi R, Tharreau D. Coexistence of multiple endemic and pandemic lineages of  
475 the rice blast pathogen. mBio 2017;9:e01806-17.  
476

- 477 Jackson HS, Mains EB. Aecial stage of the orange leaf rust of wheat, *Puccinia triticina*  
478 Erikss. J Agric Res. 1921;22: 151–172.  
479
- 480 Jaffe DB, Butler J, Gnerre S, Mauceli E, Lindblad-Toh K, et al. Whole-genome  
481 sequence assembly for mammalian genomes: Arachne 2. Genome Res. 2003;13: 91–  
482 96.  
483
- 484 Johnston CO, Caldwell RM, Compton LE, Browder LE. Physiologic races of *Puccinia*  
485 *recondita* f. sp. *tritici* in the United States from 1926 through 1960. USDA Tech Bull.  
486 1968;1393 1–18.  
487
- 488 Kolmer JA, Acevedo MA. Genetically divergent types of the wheat leaf rust fungus  
489 *Puccinia triticina* in Ethiopia, a center of tetraploid wheat diversity. Phytopathology  
490 2016;106:380-385.  
491
- 492 Kolmer JA, Dyck PL. Gene expression in the *Triticum aestivum*-*Puccinia recondita* f.sp.  
493 *tritici* gene-for-gene model. Phytopathology. 1994;84:437-440.  
494
- 495 Kolmer JA, Hanzalova A, Goyeau H, Bayles R, Morgounov A. Genetic differentiation of  
496 the wheat leaf rust fungus *Puccinia triticina* in Europe. Plant Path. 2012;62: 21-31.  
497
- 498 Kolmer JA, Herman A, Ordoñez ME, German S, Morgounov A, Pretorius Z, Visser B,  
499 Anikster Y, Acevedo M. Endemic and panglobal genetic groups, and divergence of host-  
500 associated forms in worldwide collections of the wheat leaf rust fungus *Puccinia triticina*  
501 as determined by genotyping by sequencing. Heredity. 2020;124:397-409.  
502
- 503 Kolmer JA, Hughes ME. Physiologic specialization of *Puccinia triticina* on wheat in the  
504 United States in 2016. Plant Dis. 2018;102:1066-1071.  
505
- 506 Kolmer JA, Long DL, Hughes ME. Physiologic specialization of *Puccinia triticina* on  
507 wheat in the United States in 2007. Plant Dis. 2009;93:538-544.  
508
- 509 Kolmer JA, Long DL, Hughes ME. Physiologic specialization of *Puccinia triticina* on  
510 wheat in the United States in 2010. Plant Dis. 2012;96:1216-1221.  
511
- 512 Kolmer JA, Long DL, Hughes ME. Physiologic specialization of *Puccinia triticina* on  
513 wheat in the United States in 2011. Plant Dis. 2013;97:1103-1108.  
514
- 515 Kolmer JA, Ordoñez ME, German S, Morgounov A, Pretorius Z, Visser B, Goyeau H,  
516 Anikster Y, Acevedo M. Multilocus genotypes of the wheat leaf rust fungus *Puccinia*  
517 *triticina* in worldwide regions indicate past and current long-distance migration.  
518 Phytopathology. 2019;109:1453-1463.  
519
- 520 Kolmer JA, Ordoñez ME, Manisterski J, Anikster Y. Genetic differentiation of *Puccinia*  
521 *triticina* populations in the Middle East and genetic similarity with populations in Central  
522 Asia. Phytopathology. 2011;101:870-877

- 523  
524 Kolmer JA. Virulence of *Puccinia triticina*, the wheat leaf rust fungus, in the United  
525 States in 2017. *Plant Dis.* 2019;103:2113-2120.  
526
- 527 Li H, Durbin R. Fast and accurate long-read alignment with Burrows-Wheeler transform.  
528 *Bioinformatics* 2010;26:589–95.
- 529 Li H, Handsaker B, Wysoker A, Fennell T, Ruan J, Homer N, Marth G, Abecasis G,  
530 Durbin R, 1000 Genome Project Data Processing Group. The sequence alignment/map  
531 format and SAMtools. *Bioinformatics.* 2009;25:2078-2079.  
532
- 533 Liu JQ, Kolmer JA. Molecular and virulence diversity and linkage disequilibria in asexual  
534 and sexual populations of the wheat leaf rust fungus, *Puccinia recondita*. *Genome.*  
535 1998;41: 832–840.  
536
- 537 Long DL, Kolmer JA. A North America System of nomenclature for *Puccinia triticina*.  
538 *Phytopathology* 1989;79:525-529.  
539
- 540 McKenna A, Hanna M, Banks E, Sivachenko A, Cibulskis K, Kernytsky A, Garimella K,  
541 Altshuler D, Gabriel S, Daly M, DePristo MA. The Genome Analysis Toolkit: a  
542 MapReduce framework for analyzing next-generation DNA sequencing data. *Genome*  
543 *Res.* 2010;20:1297-303.  
544
- 545 Ordoñez ME, Kolmer JA. Simple sequence repeat diversity of a world-wide collection of  
546 *Puccinia triticina* from durum wheat. *Phytopathology.* 2007;87: 74-583.  
547
- 548 Ordoñez ME, Kolmer, JA. Differentiation of molecular genotypes and virulence  
549 phenotypes of *Puccinia triticina* from common wheat in North America. *Phytopathology.*  
550 2009;99:750-758.  
551
- 552 Park R, Burdon J, Jahoor A. Evidence for somatic hybridisation in the leaf rust pathogen  
553 of wheat (*Puccinia recondita* f. sp. *tritici*). *Mycological Res.* 1999;103;715–723.  
554
- 555 Park RF, Wellings CR. Somatic hybridization in the Uredinales. *Annu Rev. Phytopathol.*  
556 2012;50:219–239.  
557
- 558 Saari EE, Young HC, Kernkamp MF. Infection of North American *Thalictrum* ssp. with  
559 *Puccinia recondita* f.sp. *tritici*. *Phytopathology* 1968;58:939–943.  
560
- 561 Samborski DJ, Dyck PL. Inheritance of virulence in *Puccinia recondita* on six backcross  
562 lines of wheat with single genes for resistance to leaf rust. *Can J Bot.* 1976;54:1666-  
563 1671.  
564
- 565 Samborski DJ, Dyck PL. Inheritance of virulence in wheat leaf rust on the standard  
566 differential wheat varieties. *Can J Genet Cytol.* 1968;10:24–32.  
567

- 568 Savary S, Willocquet L, Pethybridge SJ, Esker P, McRoberts N, Nelson A. The global  
569 burden of pathogens and pests on major food crops. *Nat Ecol Evol.* 2019;3:430–439  
570
- 571 Statler GD. Inheritance of virulence of *Puccinia triticina* culture X47, the F<sub>1</sub> of the cross  
572 71-112 x 70-1. *Can J Plant Pathol.* 2000;22: 276–279.  
573
- 574 Statler GD. Inheritance of pathogenicity of culture 70-1, Race 1, of *Puccinia recondita*  
575 *tritici*. *Phytopathology* 1979;69: 661.  
576
- 577 Statler GD. Inheritance of virulence of culture 73-47 *Puccinia recondita*. *Phytopathology.*  
578 1977;67:906-908.  
579
- 580 Statler GD. Inheritance of virulence of *Puccinia recondita* f.sp. *tritici* on durum and  
581 spring wheat cultivars. *Phytopathology.* 1982;72: 210–213.  
582
- 583 Swafford DL. PAUP. Phylogenetic analysis using parsimony (\*and other methods).  
584 Sunderland, MA: Sinauer Associates 1998.  
585
- 586 Swafford DL. PAUP\*. Phylogenetic analysis using parsimony (\*and other methods.)  
587 Version 4.0b10. Sunderland, MA: Sinauer Associates. 2002.  
588
- 589 Webb, CA, Szabo LJ, Bakkeren G, Staples R, Garry C, Eversmeyer M, Fellers JP.  
590 Using biolistics with *Puccinia triticina* as a method of transient expression and  
591 insertional mutagenesis. *Func Int Genomics.* 2006;6:250-260  
592
- 593 Wu JQ, Sakthihumar S, Dong C, Zhang P, Cuomo CA, Park RF. Comparative  
594 genomics integrated with association analysis identifies candidate effector genes  
595 corresponding to *Lr20* in phenotype-pared *Puccinia triticina* isolates from Australia.  
596 *Front Plant Sci.* 2017;8:148.  
597
- 598 Zhang Z, Ersoz E, Lai C, Todhunter RJ, Tiwari HK, Gore MA, Bradbury PJ, Yu J, Arnett  
599 DK, Ordovas JM, Buckler ES. Mixed linear model approach adapted for genome-wide  
600 association studies. *Nature Gen.* 2010;42:355-360.  
601

602 Table 1. Genome wide SNP diversity of *Puccinia triticina* isolates in groups from North America (NA) and Europe (EU),  
 603 two groups virulent to durum wheat, and the wheat progenitor *Aegilops speltoides*.

| Population                 | Average total SNPs | Average diversity $\pi$ (nucleotide) | Average Intergenic SNPs % | Average SNP Heterozygosity % | Average Non-synonymous/synonymous SNPs | Average Nonsense/Read-through SNPs |
|----------------------------|--------------------|--------------------------------------|---------------------------|------------------------------|----------------------------------------|------------------------------------|
| NA1                        | 321,326            | $2.37 \times 10^{-3}$                | 84.0                      | 97                           | 1.659 (21,404/12,899)                  | 4.237 (603/142)                    |
| NA2                        | 422,333            | $3.12 \times 10^{-3}$                | 83.7                      | 87                           | 1.632 (28,383/17,389)                  | 4.586 (796/173)                    |
| NA3                        | 342,861            | $2.53 \times 10^{-3}$                | 84.2                      | 76                           | 1.657 (22,594/13,630)                  | 4.311 (657/152)                    |
| NA4                        | 310,033            | $2.29 \times 10^{-3}$                | 84.6                      | 66                           | 1.702 (20,426/12,000)                  | 4.992 (646/129)                    |
| NA5                        | 322,011            | $2.38 \times 10^{-3}$                | 84.1                      | 90                           | 1.654 (21,478/12,980)                  | 4.345 (628/145)                    |
| NA6                        | 346,721            | $2.56 \times 10^{-3}$                | 84.2                      | 81                           | 1.669 (22,974/13,765)                  | 4.369 (680/155)                    |
| Intl-Durum                 | 416,611            | $3.08 \times 10^{-3}$                | 84.0                      | 56                           | 1.645 (27,469/16,696)                  | 4.258 (738/174)                    |
| ETH-Durum                  | 450,544            | $3.33 \times 10^{-3}$                | 84.1                      | 56                           | 1.657 (29,843/18,010)                  | 4.254 (791/186)                    |
| Europe                     | 413,951            | $3.06 \times 10^{-3}$                | 83.8                      | 81                           | 1.635 (27,723/16,949)                  | 4.355 (794/182)                    |
| <i>Aegilops speltoides</i> | 996,187            | $7.36 \times 10^{-3}$                | 78.4                      | 35                           | 1.155 (69,440/60,101)                  | 4.045(1505/372)                    |

604

605



606 Table 2. Virulence diversity of *Puccinia triticina* isolates in SNP genotype groups from  
607 North America (NA), Europe (EU), two groups virulent to durum wheat, and the wheat  
608 progenitor *Aegilops speltoides*.

| Group      | No. of isolates | No. of virulence phenotypes | Average virulence difference |
|------------|-----------------|-----------------------------|------------------------------|
| NA1        | 4               | 3                           | 3.30                         |
| NA2        | 11              | 10                          | 3.84                         |
| NA3        | 35              | 25                          | 3.50                         |
| NA4        | 2               | 2                           | 1.00                         |
| NA5        | 32              | 23                          | 4.85                         |
| NA6        | 2               | 2.0                         |                              |
| EU         | 13              | 12                          | 4.63                         |
| Intl Durum | 13              | 3                           | 1.03                         |
| ETH Durum  | 8               | ---                         | ---                          |

609  
610  
611

612 List of Figures

613

614 Figure 1. Relationship tree of *Puccinia triticina* isolates. Relatedness based on PAUP  
615 parsimony analysis and bootstrap analysis of SNPs across the genome. Total number  
616 of SNPs included was 134,940, of which 121,907 were parsimony-informative. Markers  
617 used were 95% informative at each site. Colors represent population origin of each  
618 isolate.

619

620 Figure 2. Principal coordinate plot based on virulence to 20 lines of Thatcher wheat near  
621 isogenic for leaf rust resistance genes of *Puccinia triticina* isolates in groups from North  
622 America (NA) and Europe (EU) and two groups virulent to durum wheat.

623

624 Figure 3. Principal component (PC) analysis of 121 *P. triticina* isolates representing  
625 populations from North America, Europe, South America and from different wheat  
626 classes and species. Data is based on A) ~343,000 whole genome SNPs, or B)  
627 ~16,000 SNPs found in secreted peptides.

628

629 Figure 4. A) Median diversity ( $P_i$ ) for each contig, first for all of the SNPs, then SNPs  
630 within secreted peptides (SP). B) Median  $F_{st}$  measuring population substructure and  
631 divergence for each contig, first for all of the SNPs, then SNPs within secreted peptides;  
632 C) Median  $F_{st}$  for a contig versus density of SNPs across the contig or SP.

633

634 Figure 5. Genetic similarity as measured by identity-by-state of the 121 rust isolates  
635 based on all SNPs across the genome (black) or just SNPs within secreted peptides  
636 (red). Each data point represents five percentile bins with 95% confidence interval.

637

638 Figure 6. Genome-wide association analysis (GWAS) determining association of SNPs  
639 to changes in virulence to leaf rust resistance genes (Lr) A) Number of genome contigs  
640 that are associated with changes in virulence in all 121 isolates to individual resistance  
641 genes. B) Number of secreted peptides in all 121 isolates associated with changes in  
642 virulence. In both cases, the false discovery rate = 0.05.

643

644

645

646

647

Figure 1

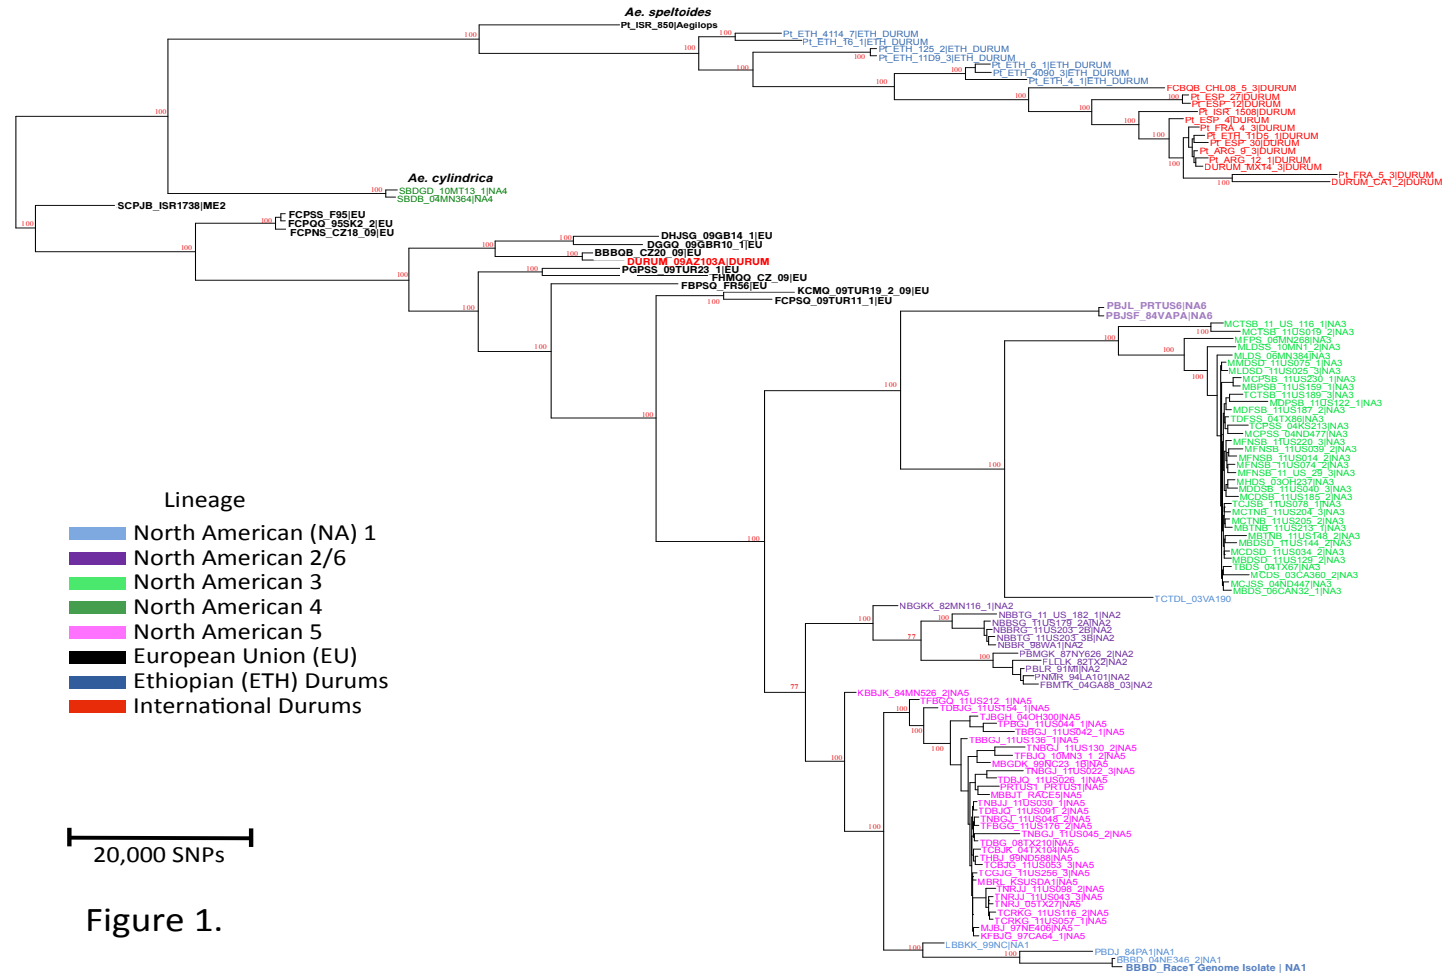

Figure 2

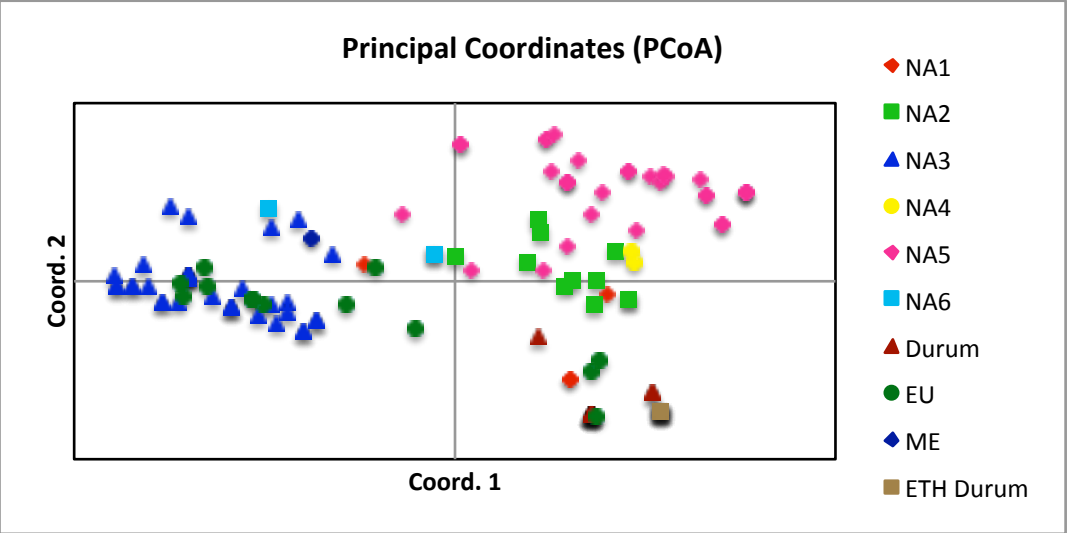

Figure 3

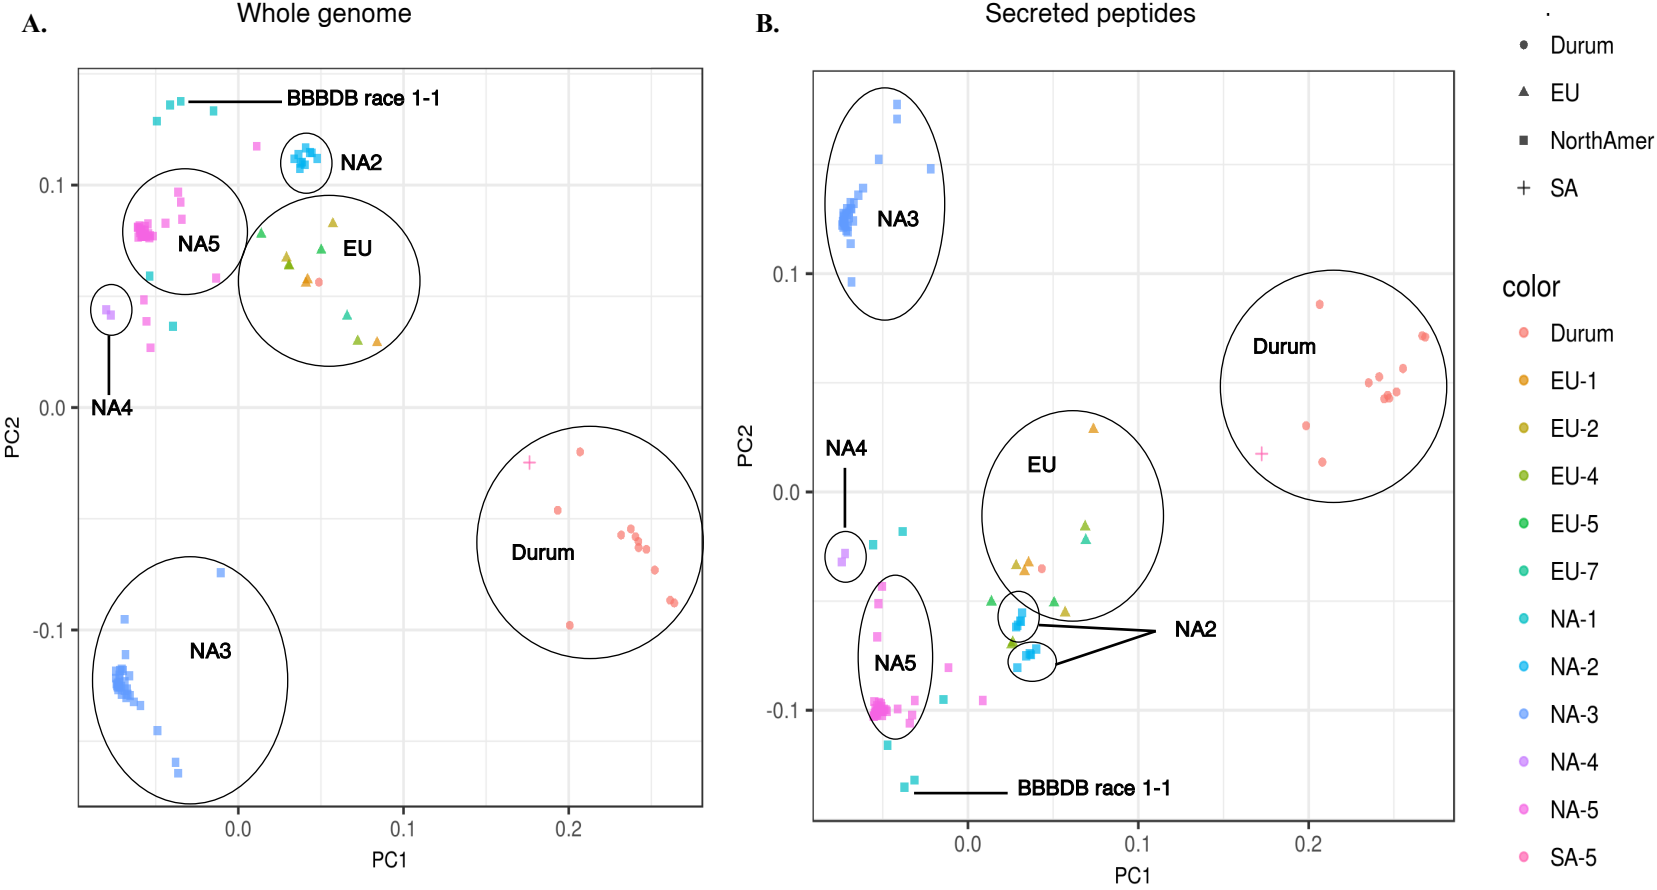

Figure 4

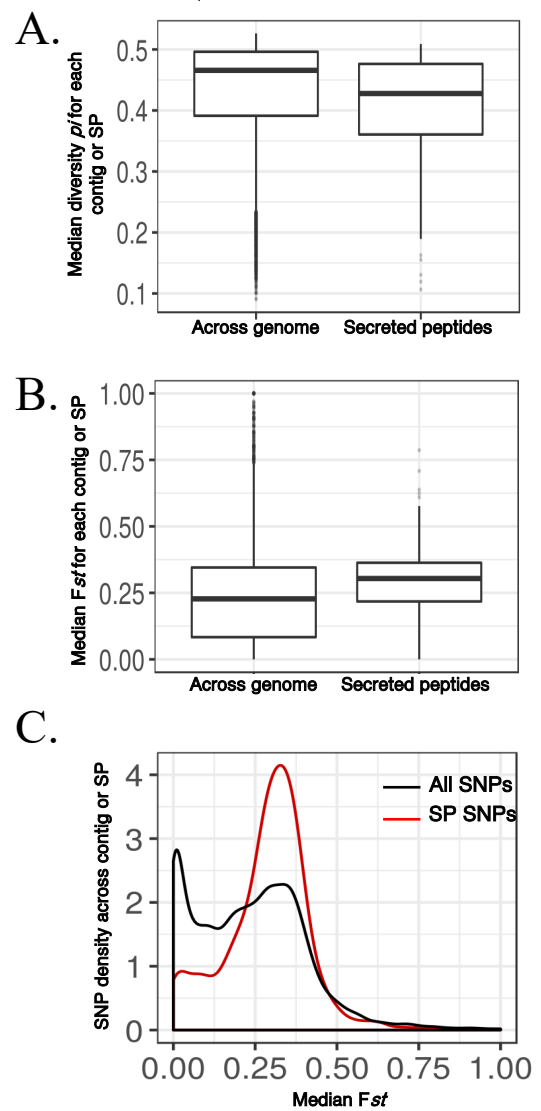

Figure 5

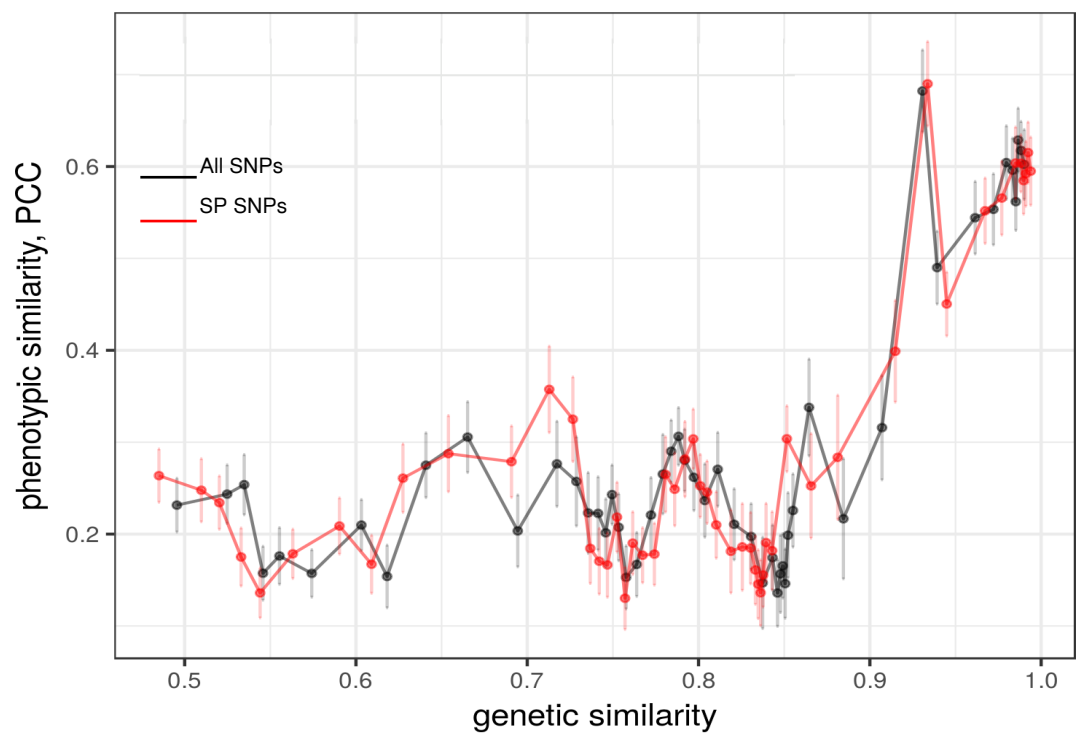

Figure 6

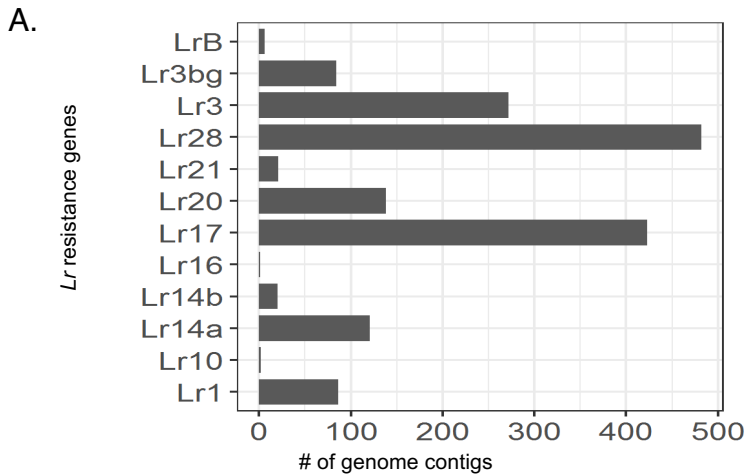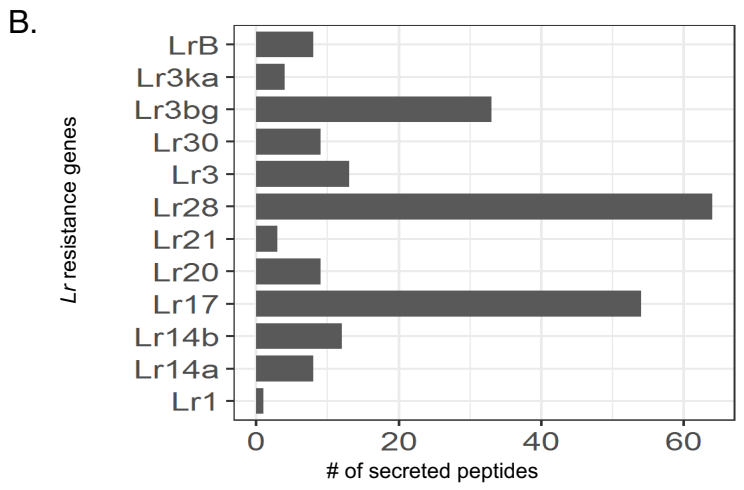

Source: https://www.biorxiv.org/content/10.1101/2020.07.22.212464v1.full.pdf
